# Supplementary material for: Catalytic ring-opening allylation of cyclic acetals with allylsilanes using silica-alumina
Source: Royal Society of Chemistry journal article supplement (doi:10.1039/c005033d), 2010-01-01
Supplement: c005033d.pdf [file c005033d.pdf]

*Supplementary Information*

**Catalytic Ring-Opening Allylation of Cyclic Acetals with Allylsilanes Using  
Silica-Alumina**

Ken Motokura, Hirokazu Yoneda, Akimitsu Miyaji, and Toshihide Baba

*Interdisciplinary Graduate School of Science and Engineering, Department of  
Environmental Chemistry and Engineering, Tokyo Institute of Technology, 4259  
Nagatsuta-cho, Midori-ku, Yokohama, 226-8502, Japan*

## Experimental Procedures

### General

Proton nuclear magnetic resonance ( $^1\text{H}$  NMR), carbon nuclear magnetic resonance ( $^{13}\text{C}$  NMR), were recorded in  $\text{CDCl}_3$  with a JNM-AL300 spectrometer operating at 300 and 75 MHz, respectively. Analytical GLC was measured using a Shimadzu GC-8A equipped with a Silicon SE-30 and OV-17 column and a thermal conductivity detector. Shimadzu QP5000 was used as GC-MS equipped with DB-1 column. The products were confirmed by comparison with reported NMR, MS, and IR data.

Silica-alumina was available from Nikki Chemical Co. as N633L ( $\text{SiO}_2$ , 80.6,  $\text{Al}_2\text{O}_3$ , 12.8 wt%, 408  $\text{m}^2/\text{g}$ ).  $\text{H}^+$ -montmorillonite was prepared from  $\text{Na}^+$ -montmorillonite using ion exchange procedure with aqueous hydrogen chloride, see: K. Motokura, N. Fujita, K. Mori, T. Mizugaki, K. Ebitani, K. Kaneda, *Angew. Chem. Int. Ed.* **2006**, *45*, 2605.  $\text{H}^+$ -Beta ( $\text{SiO}_2/\text{Al}_2\text{O}_3=25$ ),  $\text{H}^+$ -Mordenite ( $\text{SiO}_2/\text{Al}_2\text{O}_3=18.0$ ),  $\text{H}^+$ -L ( $\text{SiO}_2/\text{Al}_2\text{O}_3=6.3$ ),  $\text{H}^+$ -USY ( $\text{SiO}_2/\text{Al}_2\text{O}_3=5.9$ ) were purchased from Nikki Chemical Co..  $\text{H}^+$ -ZSM-5 ( $\text{SiO}_2/\text{Al}_2\text{O}_3=23.8$ ) was obtained from Toso Co.. Aerosil 300 was used as  $\text{SiO}_2$ .. These inorganic solid acids, except for  $\text{H}^+$ -montmorillonite, were treated at 500 °C under air and 120 °C under vacuum before use. Amberlyst was purchased from Organo Co. as Amberlyst® 15DRY. Nafion was purchased from Aldrich Inc. as Nafion® NR50. Unless otherwise noted, other materials were purchased from Wako Pure Chemicals, Tokyo Kasei Co., Kanto kagaku Co. and Aldrich Inc.

### Typical reaction procedures for ring-opening allylation of **1** with **2** using silica-alumina

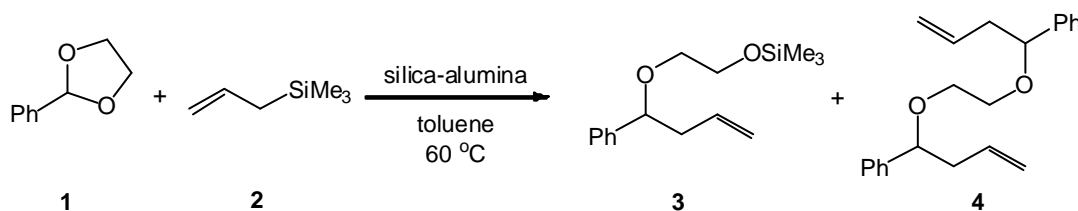

Into a glass reactor were placed silica-alumina (0.05 g), toluene (3.0 mL), **1** (3.7 mmol), **2** (4.4 mmol) in a dry Ar atmosphere. The resulting mixture was vigorously stirred at 60 °C. After 27 h, the catalyst was separated by filtration and GC analysis of the filtrate showed an 81% yield of the allylated product **3**. The filtrate was evaporated and the crude product was purified by column chromatography using silica (*n*-hexane/ether = 9/1) to afford a pure product **3**:  $^1\text{H}$  NMR (300 MHz,  $\text{CDCl}_3$ ):  $\delta$  0.10 (s, 9H), 2.36-2.64 (m, 2H), 3.32-3.44 (m, 2H), 3.70 (t,  $J = 5.3$  Hz, 2H), 4.31 (t,  $J = 6.5$  Hz, 1H), 4.98-5.06 (m, 2H), 5.70-5.84 (m, 1H), 7.23-7.43 (m, 5H);  $^{13}\text{C}$   $\{^1\text{H}\}$  NMR (75.45 MHz,  $\text{CDCl}_3$ ): -0.44, 42.6, 62.0, 70.0, 82.4, 116.7, 126.8, 127.5, 128.2, 134.9, 142.1; MS (EI)  $m/z$  (%): 45, 73(100), 82, 91, 117, 131, 179, 223( $\text{M}^+$ -allyl). The spectra of by-product **4** is as follows:  $^1\text{H}$  NMR (300 MHz,  $\text{CDCl}_3$ ):  $\delta$  2.35-2.63 (m, 4H), 3.36-3.51 (m, 4H), 4.32 (t,  $J = 8.8$  Hz, 2H), 4.98-5.06 (m, 4H), 5.69-5.86 (m, 2H), 7.23-7.35 (m, 10H);  $^{13}\text{C}$   $\{^1\text{H}\}$  NMR (75.45 MHz,  $\text{CDCl}_3$ ): 42.6, 68.0, 82.1, 116.7, 126.8, 127.5, 128.2, 135.0, 142.0; MS (EI)  $m/z$  (%): 41, 51, 77, 91, 105, 120, 131(100), 151, 191, 281( $\text{M}^+$ -allyl).

### Typical reaction procedure for hydrolysis of **3**

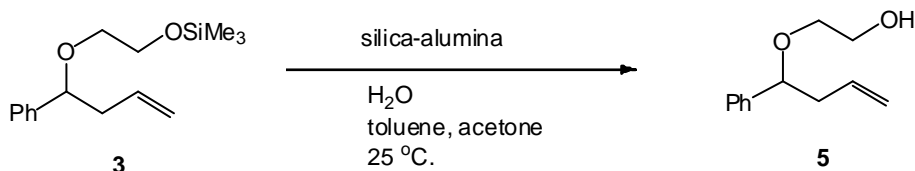

After the ring-opening allylation using silica-alumina, water (0.2 mL, 11 mmol) and acetone (3.0 mL) were added to the same flask. The resulting mixture was vigorously stirred at 25 °C for 3 h. Then, the catalyst was separated by filtration and GC analysis of the filtrate showed a 77% yield of homoallyloxyalcohol **5**. The filtrate was evaporated and the crude product was purified by column chromatography using silica (*n*-hexane/ether = 9/1 to 1/1) to afford a pure product **5**: <sup>1</sup>H NMR (300 MHz, CDCl<sub>3</sub>): δ 2.14 (br, 1H), 2.40-2.64 (m, 2H), 3.36-3.50 (m, 2H), 3.70 (t, *J* = 5.9 Hz, 2H), 4.31 (t, *J* = 8.8 Hz, 1H), 5.03-5.10 (m, 2H), 5.72-5.86 (m, 1H), 7.26-7.37 (m, 5H); <sup>13</sup>C {<sup>1</sup>H} NMR (75.45 MHz, CDCl<sub>3</sub>): 42.5, 61.9, 69.9, 82.2, 117.2, 126.6, 127.7, 128.4, 134.7, 141.7; MS (EI) *m/z* (%): 45, 51, 65, 77, 79, 91, 107(100), 131, 151(M<sup>+</sup>-allyl).

## Product Identification

### 2-(1-(4-chlorophenyl)but-3-enyloxy)ethanol

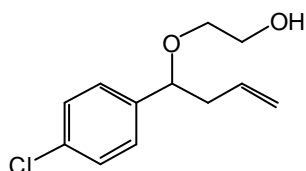

$^1\text{H}$  NMR (300 MHz,  $\text{CDCl}_3$ ):  $\delta$  2.25 (br, 1H), 2.26-2.54 (m, 2H), 3.26-3.38 (m, 2H), 3.61 (br, 2H), 4.21 (t,  $J = 6.6$  Hz, 1H), 4.95-5.00 (m, 2H), 5.60-5.74 (m, 1H), 7.20 (dd,  $J = 26.7, 8.3$  Hz, 4H);  $^{13}\text{C}$   $\{^1\text{H}\}$  NMR (75.45 MHz,  $\text{CDCl}_3$ ): 42.3, 61.8, 70.0, 81.5, 117.5, 127.9, 128.6, 133.3, 134.2, 140.1; MS (EI)  $m/z$  (%): 45(100), 51, 77, 113, 129, 141, 143, 185( $\text{M}^+$ -allyl), 187.

### 2-(non-1-en-4-yloxy)ethanol

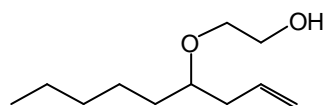

$^1\text{H}$  NMR (300 MHz,  $\text{CDCl}_3$ ): 0.89 (t,  $J = 6.6$  Hz, 3H), 1.21-1.52 (m, 8H), 2.27 (br, 3H), 3.36 (quint,  $J = 5.9$  Hz, 1H), 3.53-3.60 (m, 2H), 3.70 (br, 2H), 5.05-5.12 (m, 2H), 5.76-5.90 (m, 1H);  $^{13}\text{C}$   $\{^1\text{H}\}$  NMR (75.45 MHz,  $\text{CDCl}_3$ ): 14.0, 22.6, 25.0, 31.9, 33.8, 38.3, 62.0, 69.9, 79.4, 117.0, 135.0; MS (EI)  $m/z$  (%): 45, 55(100), 73, 83, 101, 145( $\text{M}^+$ -allyl).
